# Supplementary material for: Time Course Analysis of Skeletal Muscle Pathology of GDE5 Transgenic Mouse
Source: PubMed Central journal article supplement (PMC5033411; doi:10.1371/journal.pone.0163299), 2016-09-22

**A**

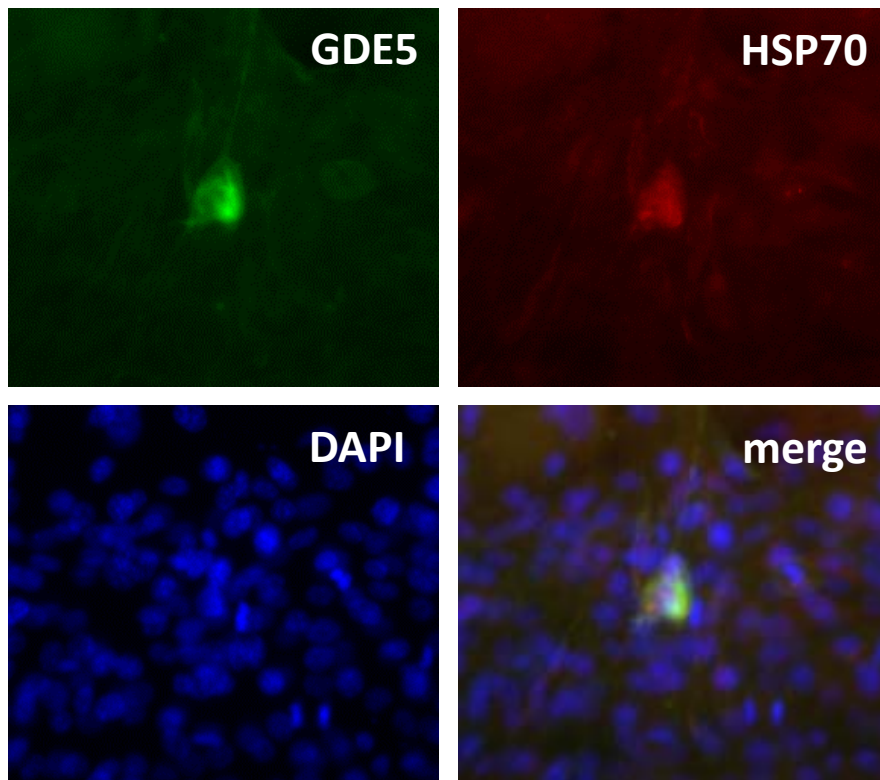

**B**

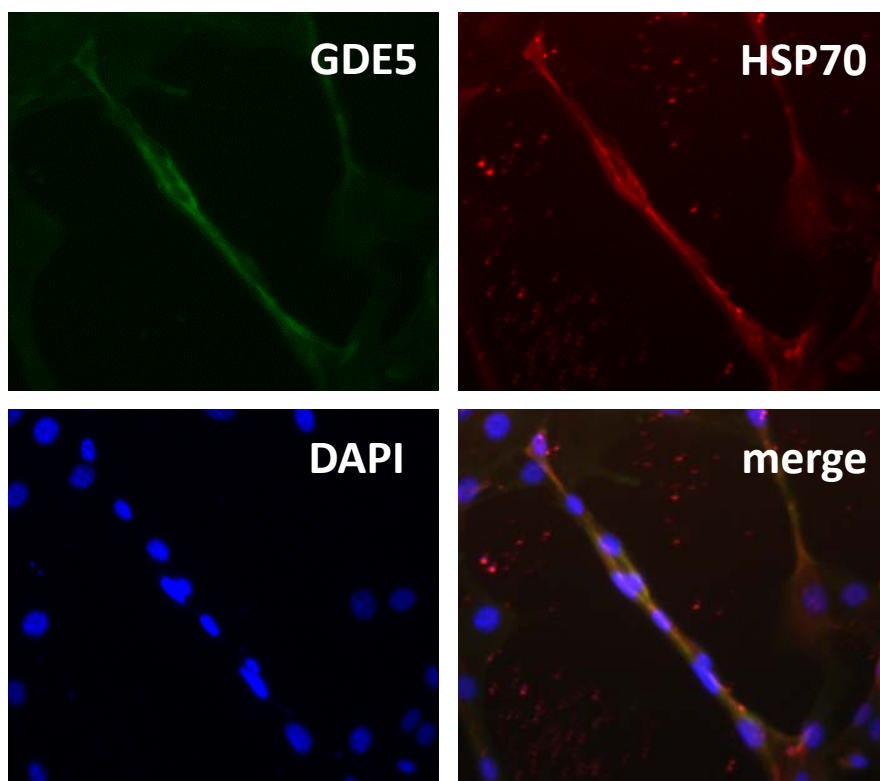

Supplement: pone.0163299.s006.pdf [file pone.0163299.s006.pdf]
